# Supplementary material for: Advanced endoscopic resection for colorectal dysplasia in inflammatory bowel disease: a meta-analysis
Source: PubMed Central journal article supplement — Endosc Int Open. 2022 May 13;10(5):E593–601. doi: 10.1055/a-1784-7063 (PMC9106415; doi:10.1055/a-1784-7063), 2022-05-13
Supplement: 2352supmat_10-1055-a-1784-7063.pdf [file 2352supmat_10-1055-a-1784-7063.pdf]

## Supplementary material

**SUPPLEMENTARY MATERIALS****Advanced Endoscopic Resection For Colorectal Dysplasia In Inflammatory Bowel Diseases: A Meta-Analysis**

Sonmoon Mohapatra, MD<sup>1,2</sup>, Kesavan Sankaramangalam, MD<sup>1</sup>, Chawin Lopimpisuth, MD<sup>2</sup>, Oluwatoba Moninuola, MD<sup>1</sup>, Malorie Simons, MD<sup>2</sup>, Julie Nanavati, MLS, MA<sup>3</sup>, Leah Jager, PhD<sup>4</sup>, Debra Goldstein, MD<sup>1</sup>, Arkady Broder, MD<sup>1</sup>, Venkata Akshintala, MD<sup>2</sup>, Reezwana Chowdhury, MD<sup>2</sup>, Alyssa Parian, MD<sup>2</sup>, Mark G Lazarev, MD<sup>2</sup>, Saowanee Ngamruengphong, MD<sup>2Δ</sup>

## Supplementary material

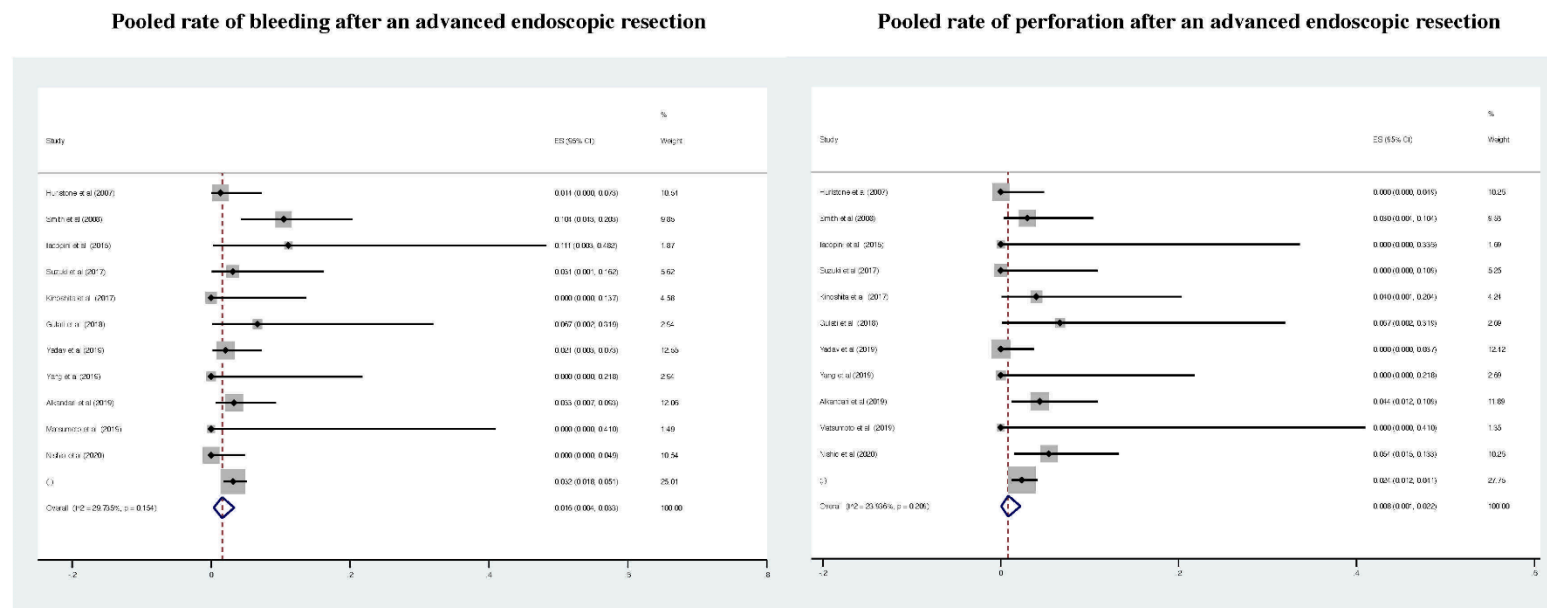

**Supplementary Figure 1:** Forest plot, pooled rate of bleeding and perforation after endoscopic resection for IBD-associated dysplasia

## Supplementary material

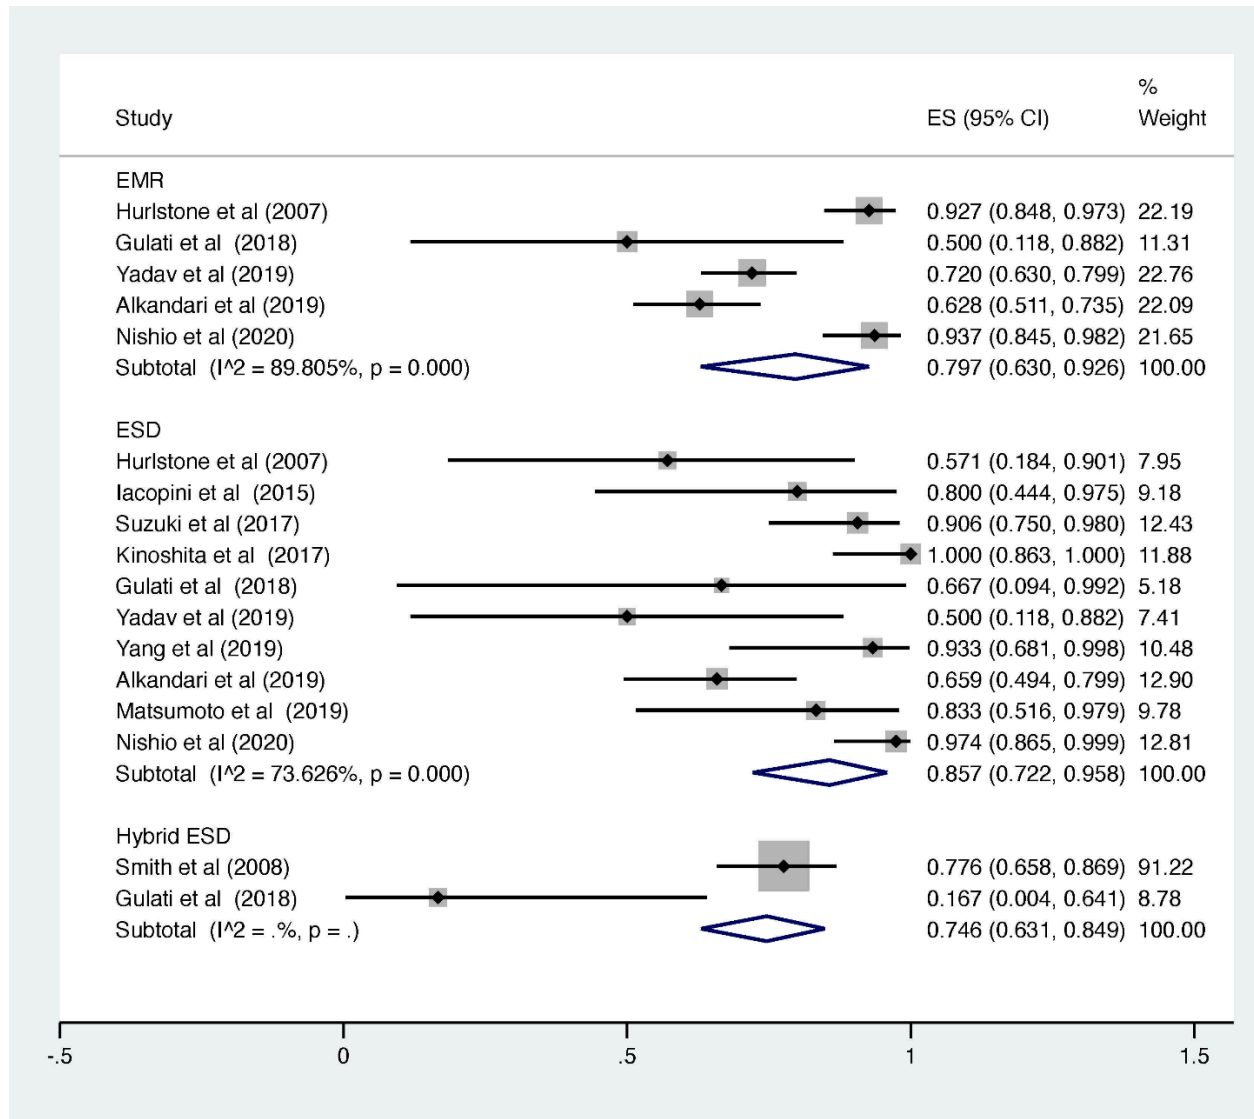

**Supplementary Figure 2:** Forest plot, pooled rate of en-bloc resection of ESD, EMR and hybrid ESD

## Supplementary material

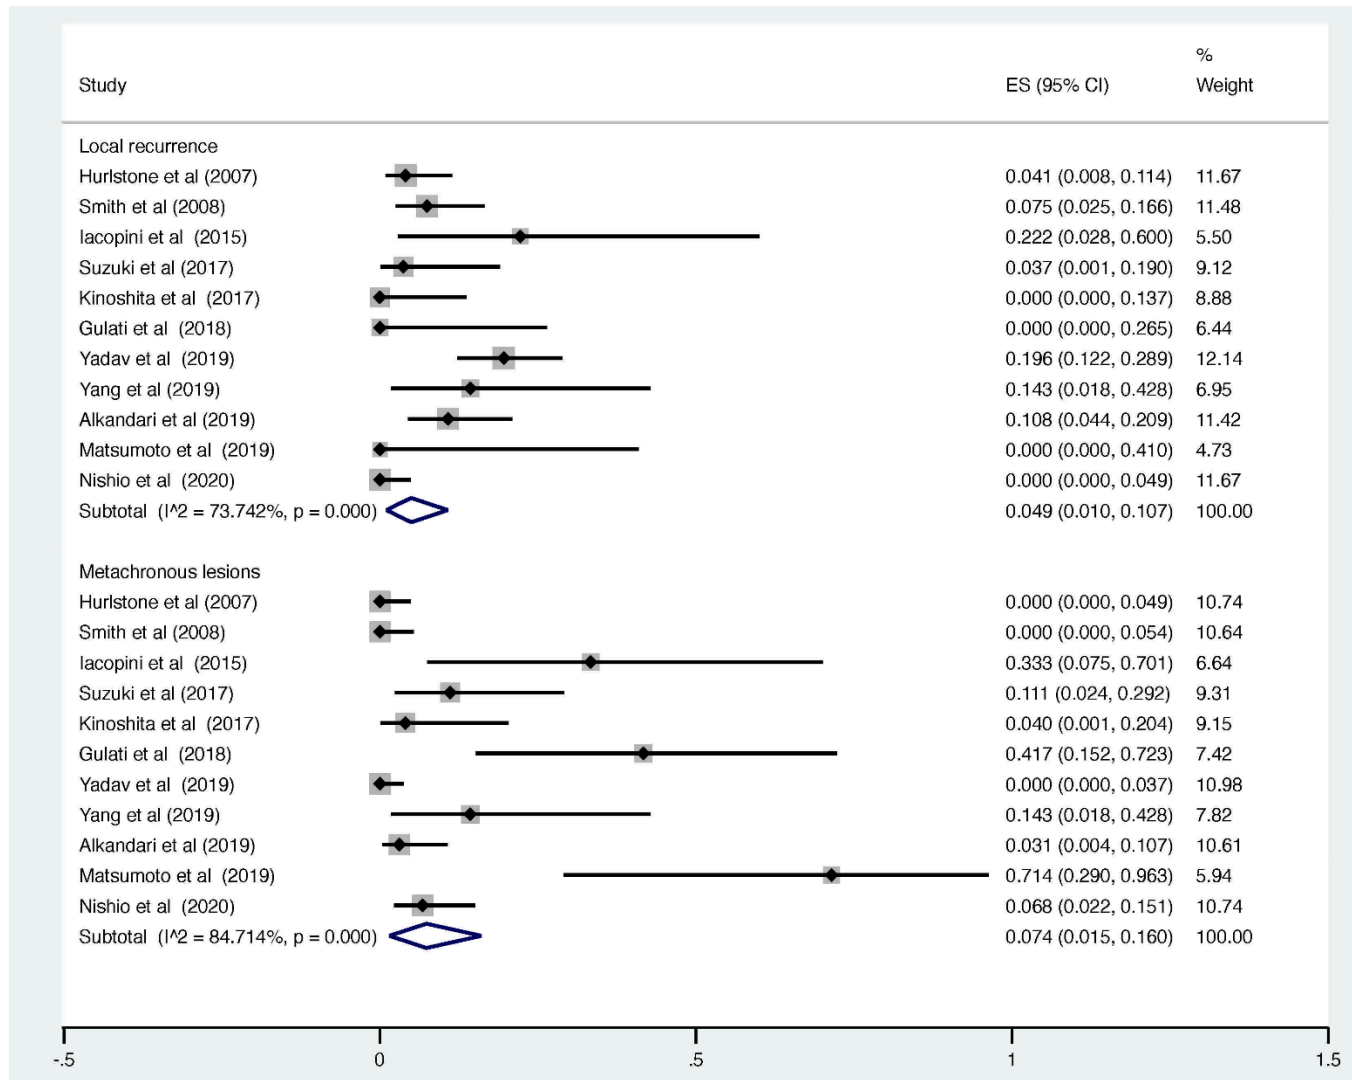

**Supplementary Figure 3:** Forest plot, pooled rate of local recurrence and metachronous dysplasia after endoscopic resection during surveillance period

## Supplementary material

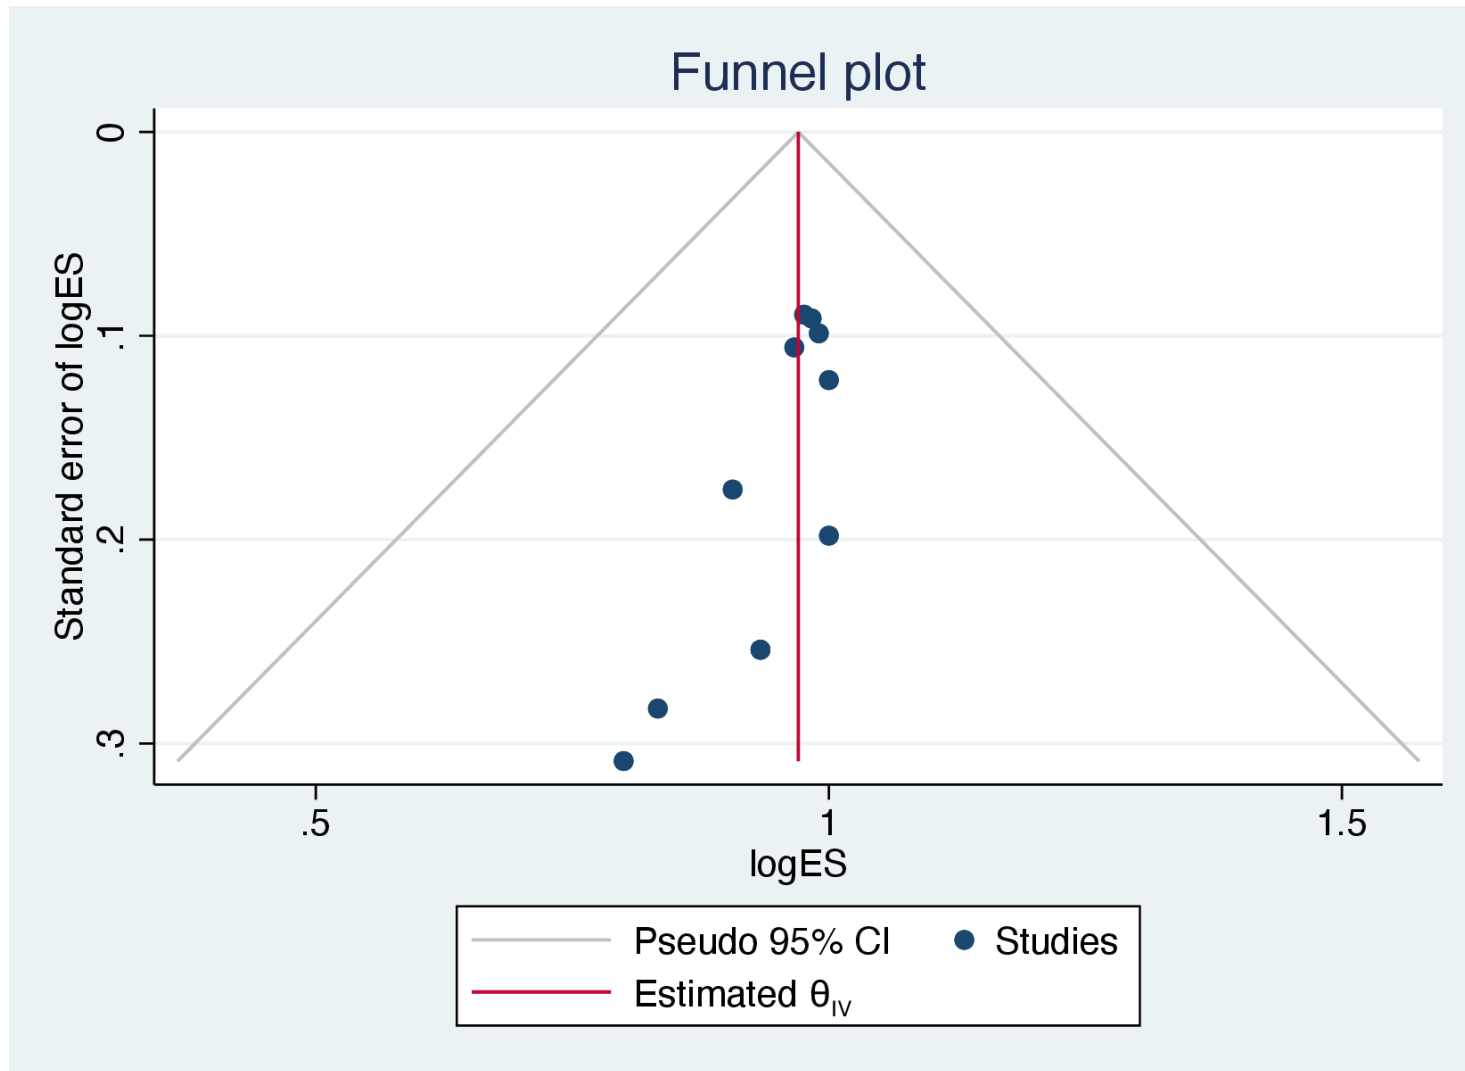

Supplementary Figure 4: Publication bias, Funnel plot

## Supplementary material

**Appendix-A: Literature search strategy****Medline (PubMed)**

"Endoscopic Mucosal Resection"[Mesh] OR (endoscopic resection\*[tiab] OR endoscopic mucosal resection\*[tiab] OR Endoscopic Submucosal Dissection\*[tiab] OR endoscopic therap\*[tiab] OR endoscopic dissection\*[tiab] OR polypectomy\*[tiab])  
AND

"Inflammatory Bowel Diseases"[Mesh] OR inflammatory bowel disease\*[tiab] OR colitis[tiab] OR crohn\*[tiab]

**Embase (Embase.com)**

(endoscopic mucosal resection'/exp) OR (“endoscopic resection\*” OR “endoscopic mucosal resection\*” OR “Endoscopic Submucosal Dissection\*” OR “endoscopic therap\*” OR “endoscopic dissection\*” OR polypectom\*):ti,ab

AND

(inflammatory bowel disease'/exp) OR (“inflammatory bowel disease\*” OR colitis OR crohn\*):ti,ab

**Web of Science**

TS=(“endoscopic resection\*” OR “endoscopic mucosal resection\*” OR “Endoscopic Submucosal Dissection\*” OR “endoscopic therap\*” OR “endoscopic dissection\*” OR polypectom\*)

AND

TS=(“inflammatory bowel disease\*” OR colitis OR crohn\*)

**Cochrane Library**

[mh "Endoscopic Mucosal Resection"] OR (“endoscopic resection\*” OR “endoscopic mucosal resection\*” OR “Endoscopic Submucosal Dissection\*” OR “endoscopic therap\*” OR “endoscopic dissection\*” OR polypectomy)

AND

[mh "Inflammatory Bowel Diseases"] OR “inflammatory bowel disease\*” OR colitis OR crohn\*

## Supplementary material

Supplementary Table 1: Bias assessment in individual studies

| Author, year          | Representativeness of the exposed cohort | Ascertainment of exposure | Demonstration that outcome of interest was not present at start of study | Assessment of outcome | Was follow-up long enough for outcomes to occur | Adequacy of follow up of cohorts |
|-----------------------|------------------------------------------|---------------------------|--------------------------------------------------------------------------|-----------------------|-------------------------------------------------|----------------------------------|
| Hurlstone et al, 2007 | Yes                                      | Yes                       | Yes                                                                      | Yes                   | Yes                                             | Yes                              |
| Smith et al, 2008     | Yes                                      | Yes                       | Yes                                                                      | Yes                   | Yes                                             | Yes                              |
| Iacopini et al, 2015  | Yes                                      | Yes                       | Yes                                                                      | Yes                   | Yes                                             | Yes                              |
| Suzuki et al, 2017    | Yes                                      | Yes                       | Yes                                                                      | Yes                   | Yes                                             | Yes                              |
| Kinoshita et al, 2017 | Yes                                      | Yes                       | Yes                                                                      | Yes                   | Yes                                             | Yes                              |
| Gulati et al, 2018    | Yes                                      | Yes                       | Yes                                                                      | Yes                   | Yes                                             | No                               |
| Yadav et al, 2019     | Yes                                      | Yes                       | Yes                                                                      | Yes                   | Yes                                             | Yes                              |
| Yang et al, 2019      | Yes                                      | Yes                       | Yes                                                                      | Yes                   | Yes                                             | Yes                              |
| Alkandari et al, 2019 | Yes                                      | Yes                       | Yes                                                                      | Yes                   | Yes                                             | No                               |
| Matsumoto et al, 2019 | Yes                                      | Yes                       | Yes                                                                      | Yes                   | Yes                                             | Yes                              |
| Nishio et al, 2020    | Yes                                      | Yes                       | Yes                                                                      | Yes                   | Yes                                             | Yes                              |

## Supplementary material

Supplementary Table 2: Lesion characteristics in the included studies

| Author (year)           | Type of lesion (n) |              | Median size of the lesions (mm) | Characteristics of lesions with visible dysplasia (n) |    |     |     |     |        |         |         |       |        |
|-------------------------|--------------------|--------------|---------------------------------|-------------------------------------------------------|----|-----|-----|-----|--------|---------|---------|-------|--------|
|                         | Polypoid           | Non polypoid |                                 | (Paris classification)                                |    |     |     |     |        |         |         |       |        |
|                         |                    |              |                                 | Ip                                                    | Is | IIa | IIb | IIc | Is+IIa | IIa+IIb | IIa+IIc | LST-G | LST-NG |
| Hurlstone et al (2007)* | 0                  | 89           | 21.5 (2-48)                     | -                                                     |    | 82  |     |     | -      | -       | -       | 4     | 3      |
| Smith et al (2008)*     | 24                 | 43           | 22.5 (8-62)                     | -                                                     | 24 | 13  |     |     | -      | -       | -       | 19    | 11     |
| Iacopini et al (2015)   | 0                  | 10           | 15 (10-20)                      | -                                                     | -  | -   | -   | -   | -      | -       | -       | 5     | 5      |
| Suzuki et al (2017)     | 2                  | 30           | 33 (12-73)                      | -                                                     | 2  | 3   | 1   |     | 4      | 8       | 1       | 8     | 5      |
| Kinoshita et al (2017)  | 5                  | 20           | 21.6 ± 12.8 (mean)              | -                                                     | 5  | 14  | 5   | 1   | -      | -       | -       | -     | -      |
| Gulati et al (2018)     | 0                  | 15           | 40 (20-90)                      | -                                                     |    | 8   | 5   |     | 2      | -       | -       | -     | -      |
| Yadav et al (2019)      | 76                 | 48           | 15 (10-60)                      | 7                                                     | 69 | 45  | 2   | 1   | -      | -       | -       | -     | -      |
| Yang et al (2019)       | 1                  | 14           | 23 (12-48)                      | -                                                     | 1  | 12  |     |     | 2      | -       | -       | -     | -      |
| Alkandari et al (2019)  | 40                 | 79           | 27 (mean)                       | NA                                                    |    |     |     |     |        |         |         |       |        |
| Matsumoto et al (2019)  | 2                  | 10           | 15 (8-35)                       | NA                                                    |    |     |     |     |        |         |         |       |        |
| Nishio et al (2020)     | 47                 | 55           | 12 ± 9.6 (mean)                 | 5                                                     | 42 | 55  |     |     |        |         |         |       |        |

NA = Not available, \*Calculated mean size



## Supplementary material

Supplementary Table 3. Outcomes of the endoscopic resection technique in the included studies

| Study (year)          | Number of lesions (n) | Endoscopic resection techniques (%) |            |     | En bloc (%) | Complete endoscopic resection (%) | Adverse events |               |             |                           | Number of patients requiring surgery | Reasons for surgery (number of patients)                               |
|-----------------------|-----------------------|-------------------------------------|------------|-----|-------------|-----------------------------------|----------------|---------------|-------------|---------------------------|--------------------------------------|------------------------------------------------------------------------|
|                       |                       | EMR                                 | Hybrid ESD | ESD |             |                                   | Early bleeding | Late bleeding | Perforation | Post polypectomy syndrome |                                      |                                                                        |
| Hurlstone et al 2007* | 89                    | 92.1                                | 0          | 7.8 | 89.8        | 96.6                              | 0              | 1             | 0           | 0                         | 3                                    | Non lifting (3)                                                        |
| Smith et al 2008      | 67                    | 0                                   | 100        | 0   | 78          | 100                               | 5              | 2             | 2           | 2                         | 0                                    | -                                                                      |
| Iacopini et al 2015   | 10                    | 0                                   | 0          | 100 | 80          | 80                                | 0              | 1             | 0           | 0                         | 1                                    | Invasive cancer T1 (SM1) (1)                                           |
| Suzuki et al 2017     | 32                    | 0                                   | 0          | 100 | 90          | 90.6                              | 0              | 1             | 0           | 0                         | 4                                    | Invasive cancer T1 (2), patient preference (2)                         |
| Kinoshita et al 2017  | 25                    | 0                                   | 0          | 100 | 100         | 100                               | 0              | 0             | 1           | 0                         | 5                                    | Invasive cancer (5)                                                    |
| Gulati et al 2018     | 15                    | 40                                  | 40         | 20  | 40          | 93.3                              | 0              | 1             | 1           | 0                         | 0                                    | -                                                                      |
| Yadav et al 2019      | 124                   | 95                                  | 0          | 5   | 71          | 97.5                              | 0              | 2             | 0           | 0                         | 11                                   | Invasive cancer (3), Incomplete resection (3), medically refractory to |

## Supplementary material

|                         |     |    |      |      |      |      |   |   |   |   |   |   | therapy (3),<br>HGD (2)                                                             |
|-------------------------|-----|----|------|------|------|------|---|---|---|---|---|---|-------------------------------------------------------------------------------------|
| Yang et al<br>2019      | 15  | 0  | 0    | 100  | 93   | 93.3 | 0 | 0 | 0 | 0 | 0 | 1 | Invasive cancer<br>(1)                                                              |
| Alkandari<br>et al 2019 | 119 | 65 | 14.3 | 20.2 | 63.8 | 98.3 | 3 | 0 | 4 | 0 | 0 | 8 | Perforation (1),<br>invasive cancer<br>(5), incomplete<br>resection (2)             |
| Matsumoto<br>et al 2019 | 12  | 0  | 0    | 100  | 83   | 83.3 | 0 | 0 | 0 | 0 | 0 | 1 | Incomplete<br>resection (1)                                                         |
| Nishio et<br>al 2020    | 102 | 62 |      | 38   | 95   | 99   | 0 | 0 | 4 | 0 | 0 | 8 | Invasive cancer<br>(1), incomplete<br>resection/non<br>R0 resection<br>(4), HGD (3) |

\*46 lesions which were resected with simple polypectomy technique were excluded from the final analysis. NA = Not available.
